# Supplementary material for: BuShen HuoXue decoction improves fertility through intestinal hsp-16.2-mediated heat-shock signaling pathway in Caenorhabditis elegans
Source: Front Pharmacol. 2023 Jun 2;14:1210701. doi: 10.3389/fphar.2023.1210701 (PMC10272376; doi:10.3389/fphar.2023.1210701)
Supplement: Supplementary file 14 [file Table10.XLSX]

## Sheet: Fig. 4 A
Brood size
	DCL569
Serial number of nematodes	Control	BPA	BPA+BSHX	BPA+BSHX+hsp16.2 RNAi
1	220	106	116	33
2	103	115	124	47
3	147	71	140	147
4	162	58	139	103
5	228	87	96	119
6	178	102	164	58
7	169	87	172	97
8		102	80	48
9		60	82	52
10		101	113	112
11		39	104	129
12		69	72	75
13		71	71	54
14			146	15
15				93
Note:
BPA：175 μg/mL BSHX：62.5 mg/mL

## Sheet: Fig. 4 B
Brood size
	VP303
Serial number of nematodes	Control	BPA	BPA+BSHX	BPA+BSHX+hsp16.2 RNAi
1	253	62	147	88
2	194	88	150	41
3	159	108	194	47
4	181	78	156	128
5	222	76	88	71
6	165	49	168	47
7	162	77	86	36
8	157	86	109	52
9	167	52	128	55
10	138	94	156	55
11		97	110	86
12		72	78	104
13		61	124	50
14			121
Note:
BPA：175 μg/mL BSHX：62.5 mg/mL

## Sheet: Fig. 4 C
Brood size
	NR350
Serial number of nematodes	Control	BPA	BPA+BSHX	BPA+BSHX+hsp16.2 RNAi
1	235	91	206	192
2	196	144	180	191
3	207	148	175	158
4	225	101	171	108
5	229	74	189	153
6	208	92	164	78
7	191	107	109	148
8	191	98	194	150
9	192	90	205	201
10		136	142	135
11		127	147	156
12		136	167	172
13		117	220
14		113	152
15			115
Note:
BPA：175 μg/mL BSHX：62.5 mg/mL

## Sheet: Fig. 4 D
Number of heat stress deaths in 35℃
	DCL569
Hours	Control	BPA	BPA+BSHX	BPA+BSHX+hsp16.2 RNAi
5	0	3	0	0
7	0	1	1	1
9	2	9	2	6
10	3	6	8	1
11	4	15	8	19
12	6	10	12	20
13	3	4	2	2
14	17		7
14.5	3		9
15.5	9		0
16.5	3		1
17	1
Note:
BPA：175 μg/mL BSHX：62.5 mg/mL

## Sheet: Fig. 4 E
Number of heat stress deaths in 35℃
	VP303
Hours	Control	BPA	BPA+BSHX	BPA+BSHX+hsp16.2 RNAi
5	0	6	1	4
7	1	9	5	0
9	4	7	3	14
10	7	17	2	5
11	13	15	6	25
12	10		24
13	5		3
14	3		1
14.5	3		2
15.5	2		1
16.6	2
Note:
BPA：175 μg/mL BSHX：62.5 mg/mL

## Sheet: Fig. 4 F
Number of heat stress deaths in 35℃
	NR350
Hours	Control	BPA	BPA+BSHX	BPA+BSHX+hsp16.2 RNAi
5	0	10	0	0
7	2	16	1	3
9	2	4	5	13
10	0	8	5	19
11	11	8	6	6
12	4	1	12	8
13	6		4	1
14	8		4
14.5	9		7
15.5	6		3
Note:
BPA：175 μg/mL BSHX：62.5 mg/mL
